# Supplementary material for: Global Genomic Analysis of SARS-CoV-2 RNA Dependent RNA Polymerase Evolution and Antiviral Drug Resistance
Source: MDPI journal article supplement (doi:10.3390/microorganisms9051094), 2021-05-19

**Variant annotation**   ■ frameshift\_variant   ■ missense\_variant   ■ synonymous\_variant

**Genomes**

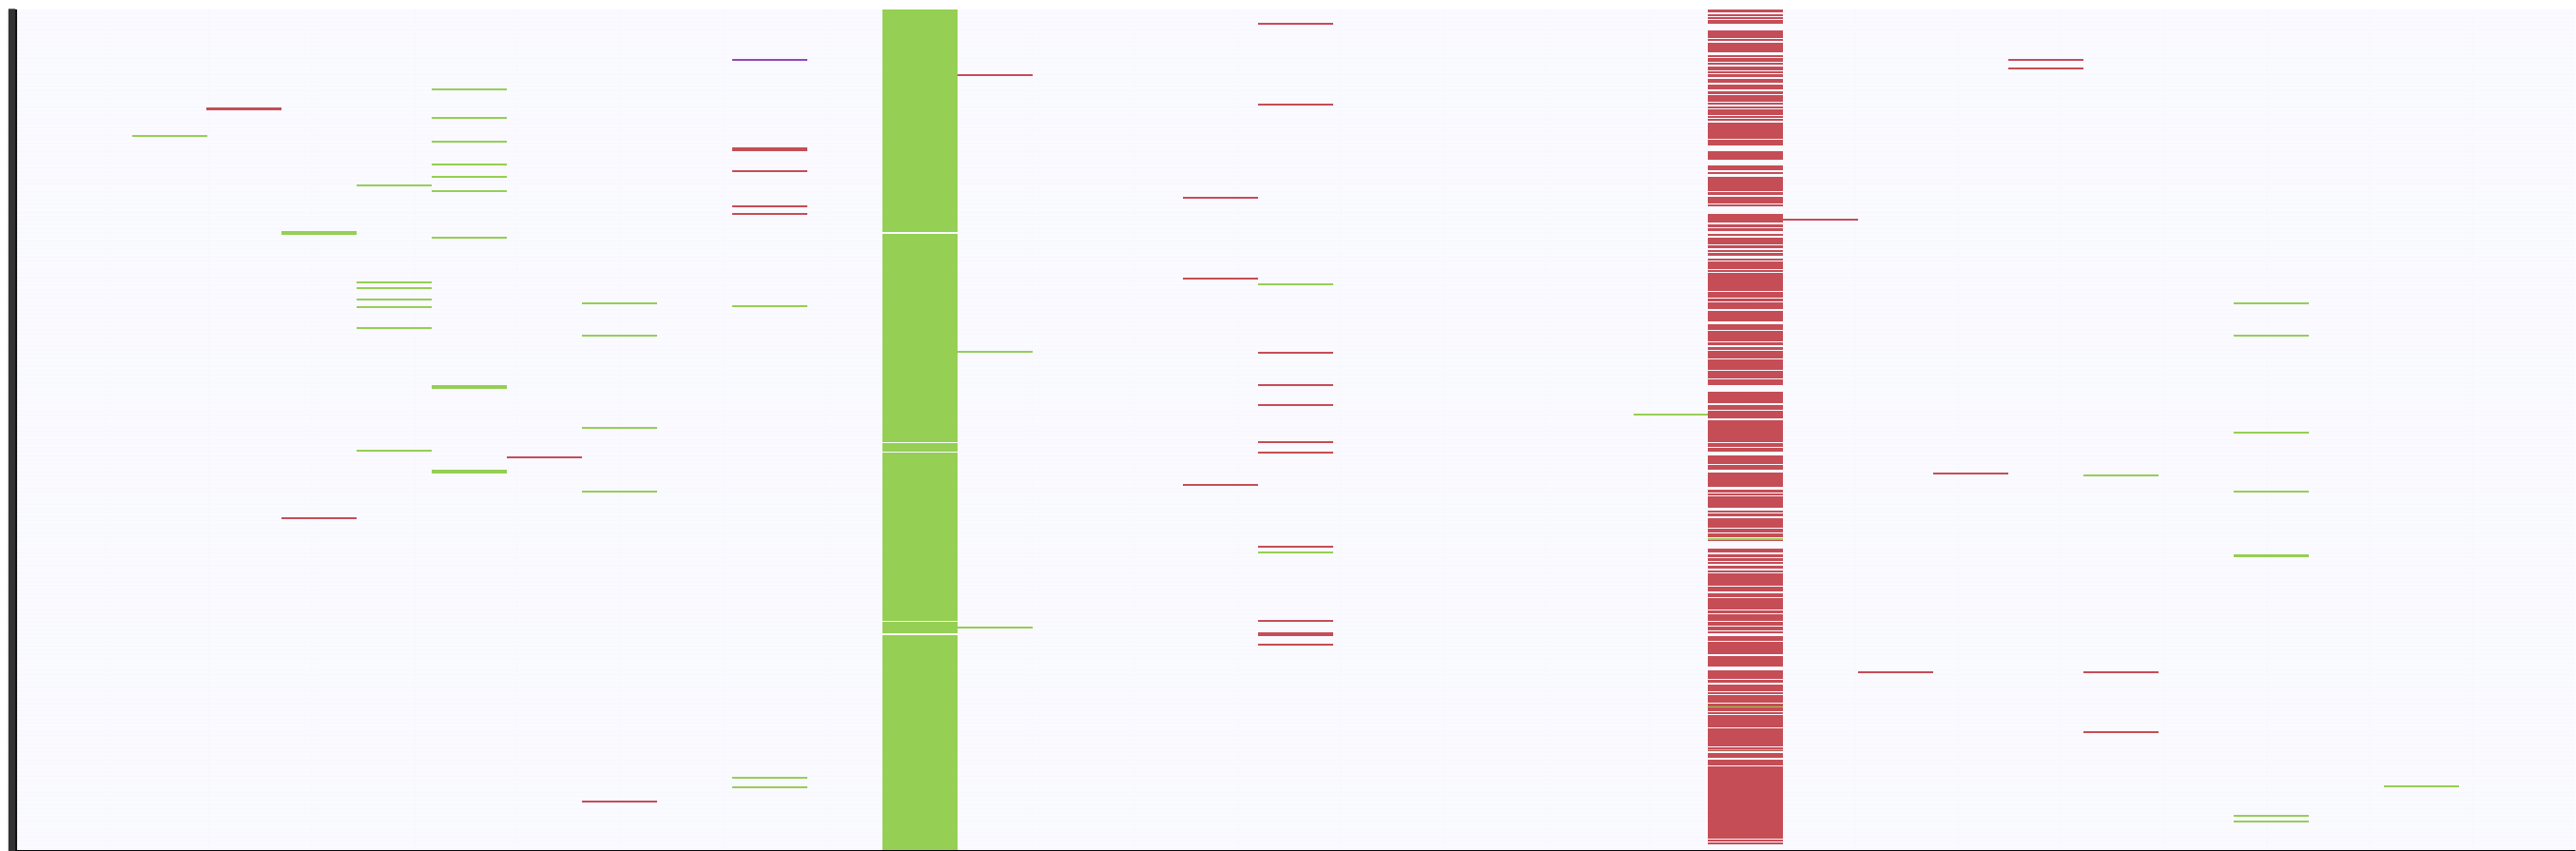

**Variant counts**

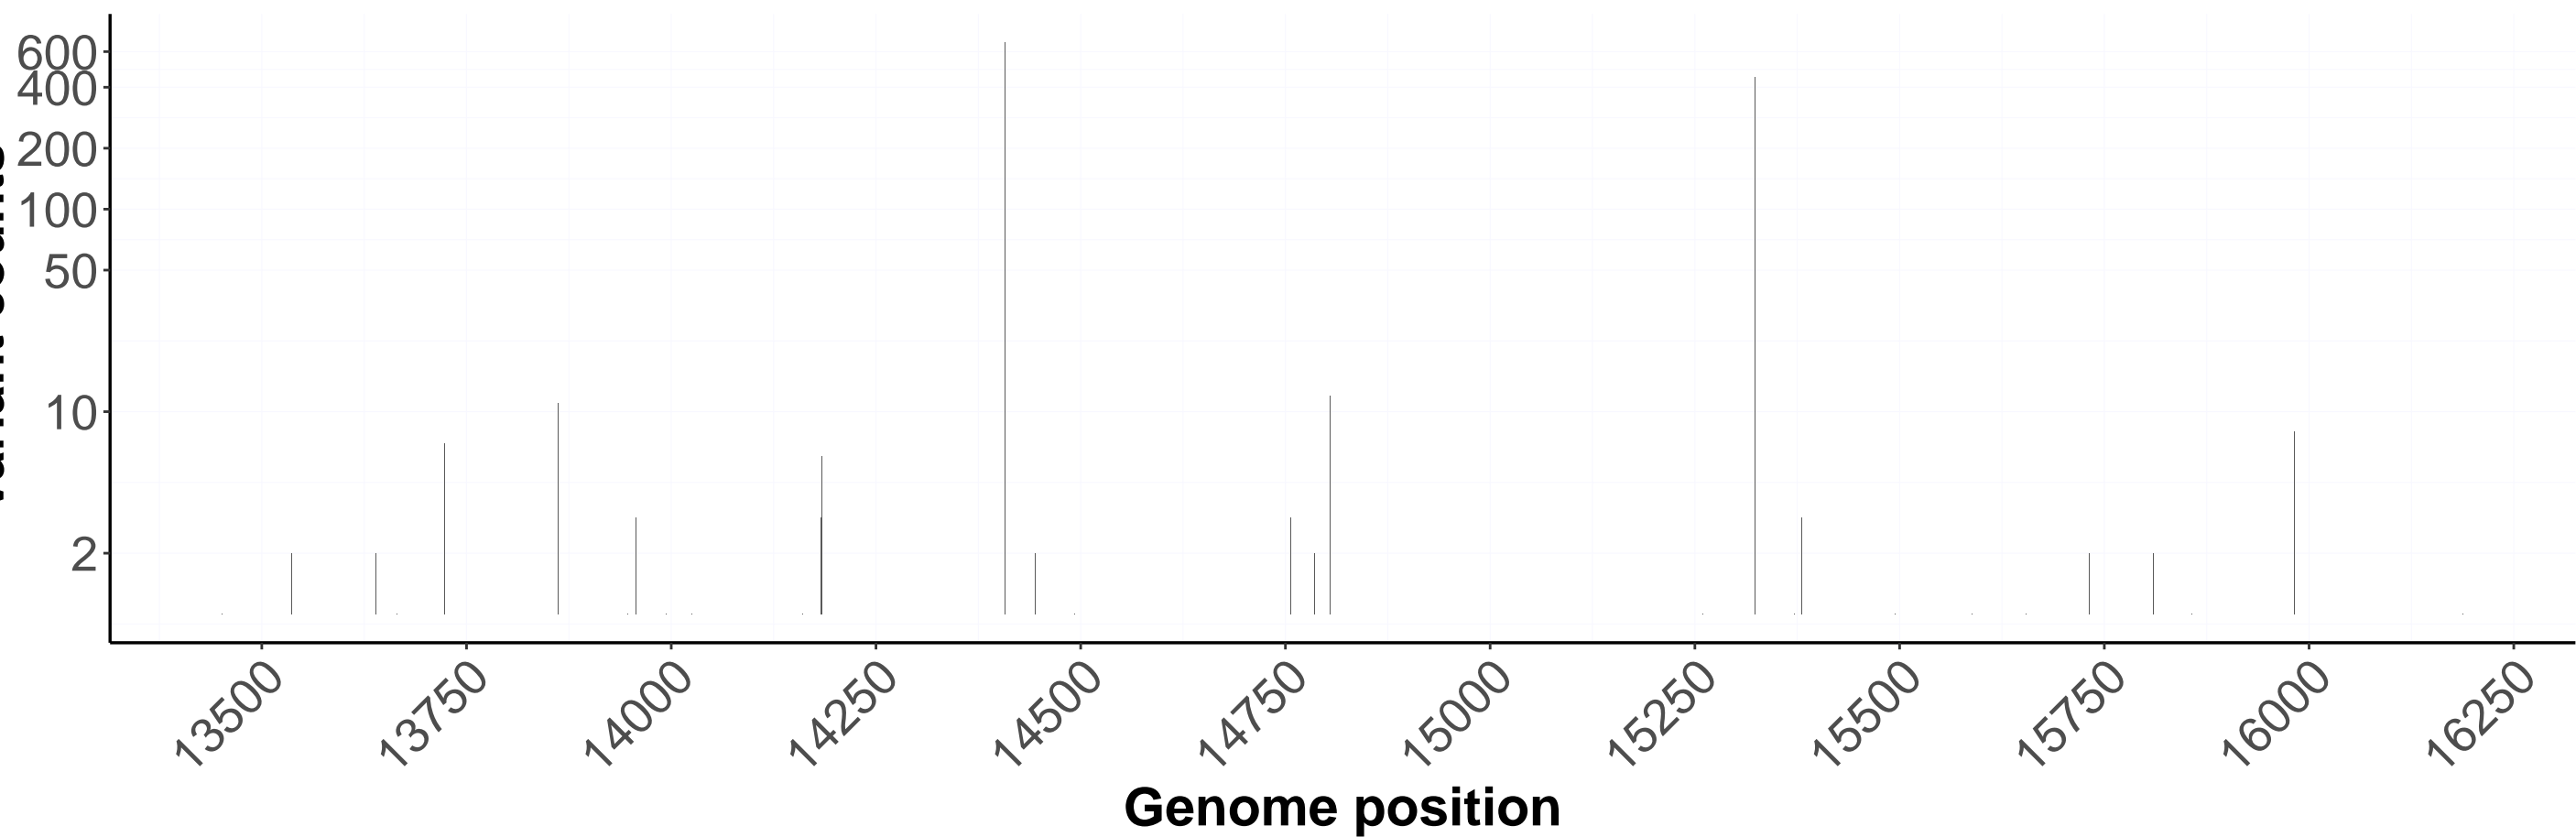

Supplement: s1 [file s1]
