# Supplementary figures and images for: Global Genomic Analysis of SARS-CoV-2 RNA Dependent RNA Polymerase Evolution and Antiviral Drug Resistance
Source: MDPI journal article supplement (doi:10.3390/microorganisms9051094), 2021-05-19

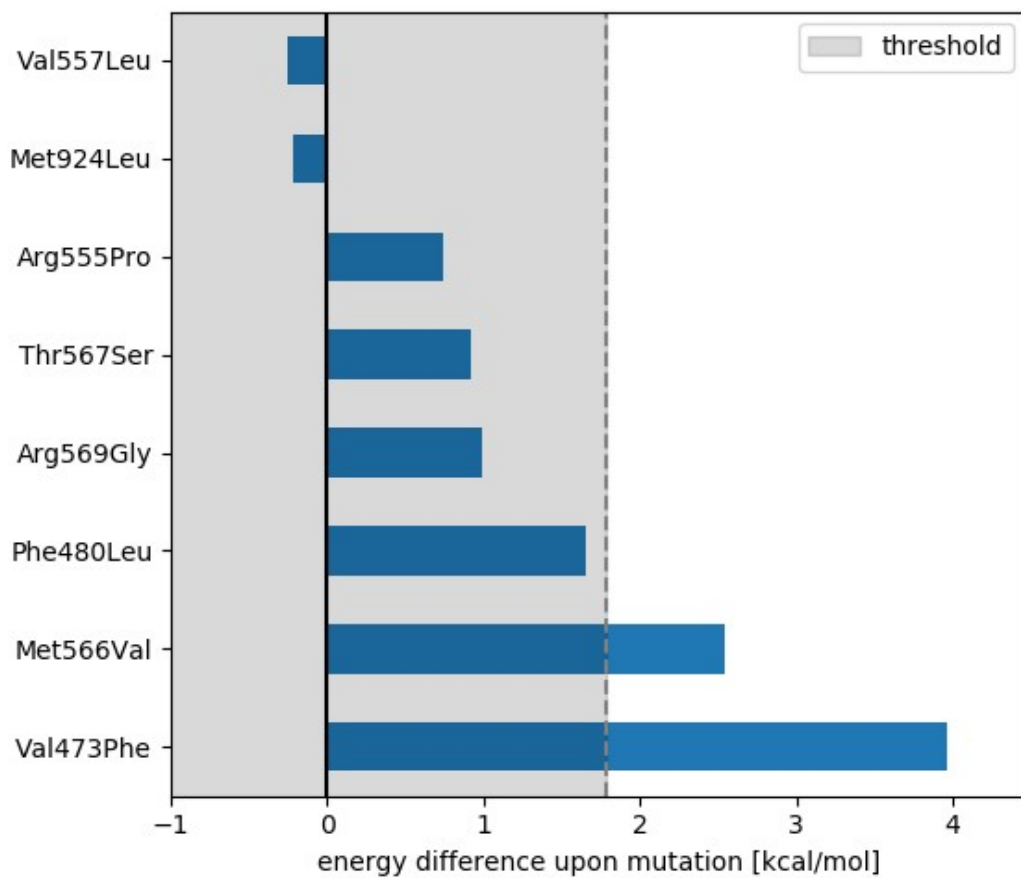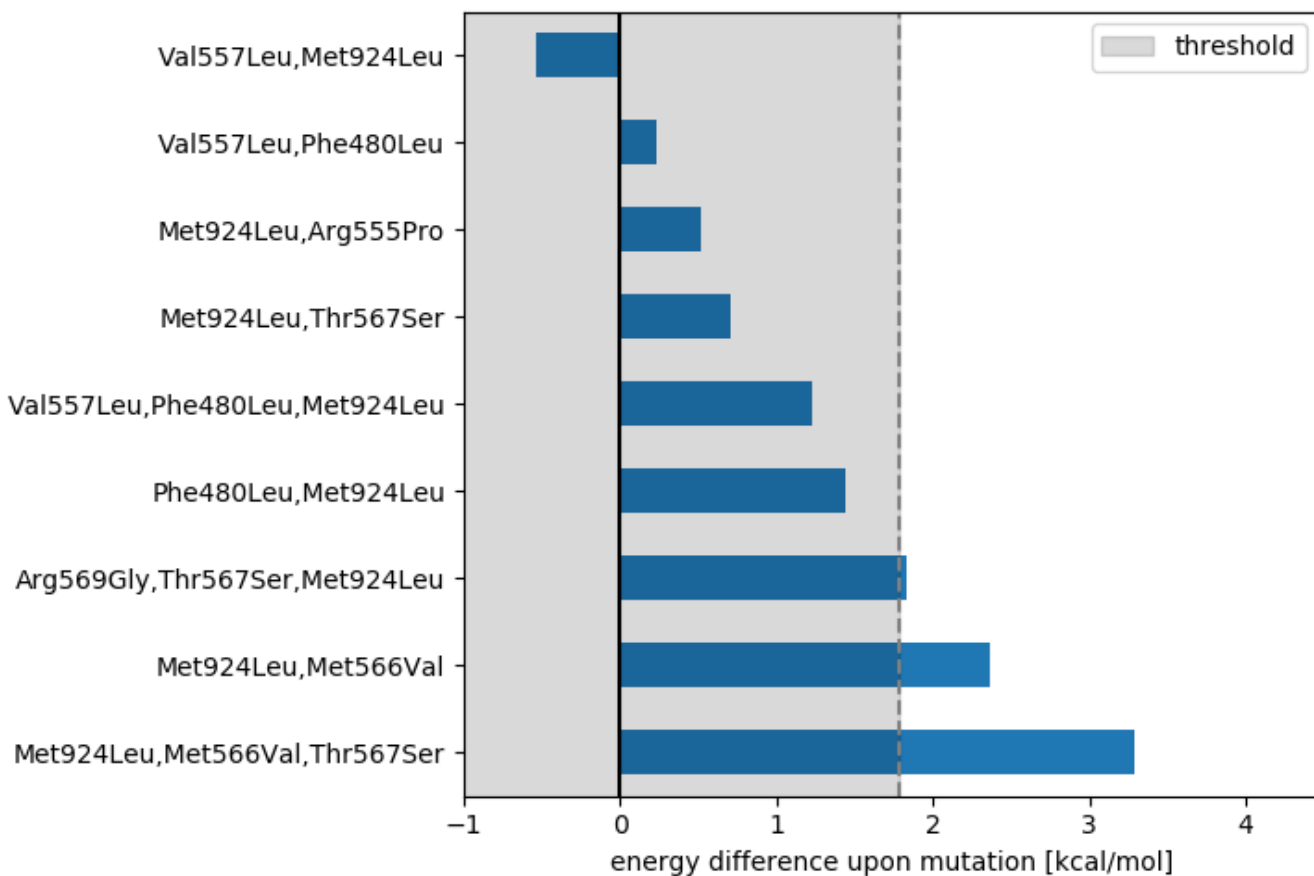

Supplement: s1 [file s1]

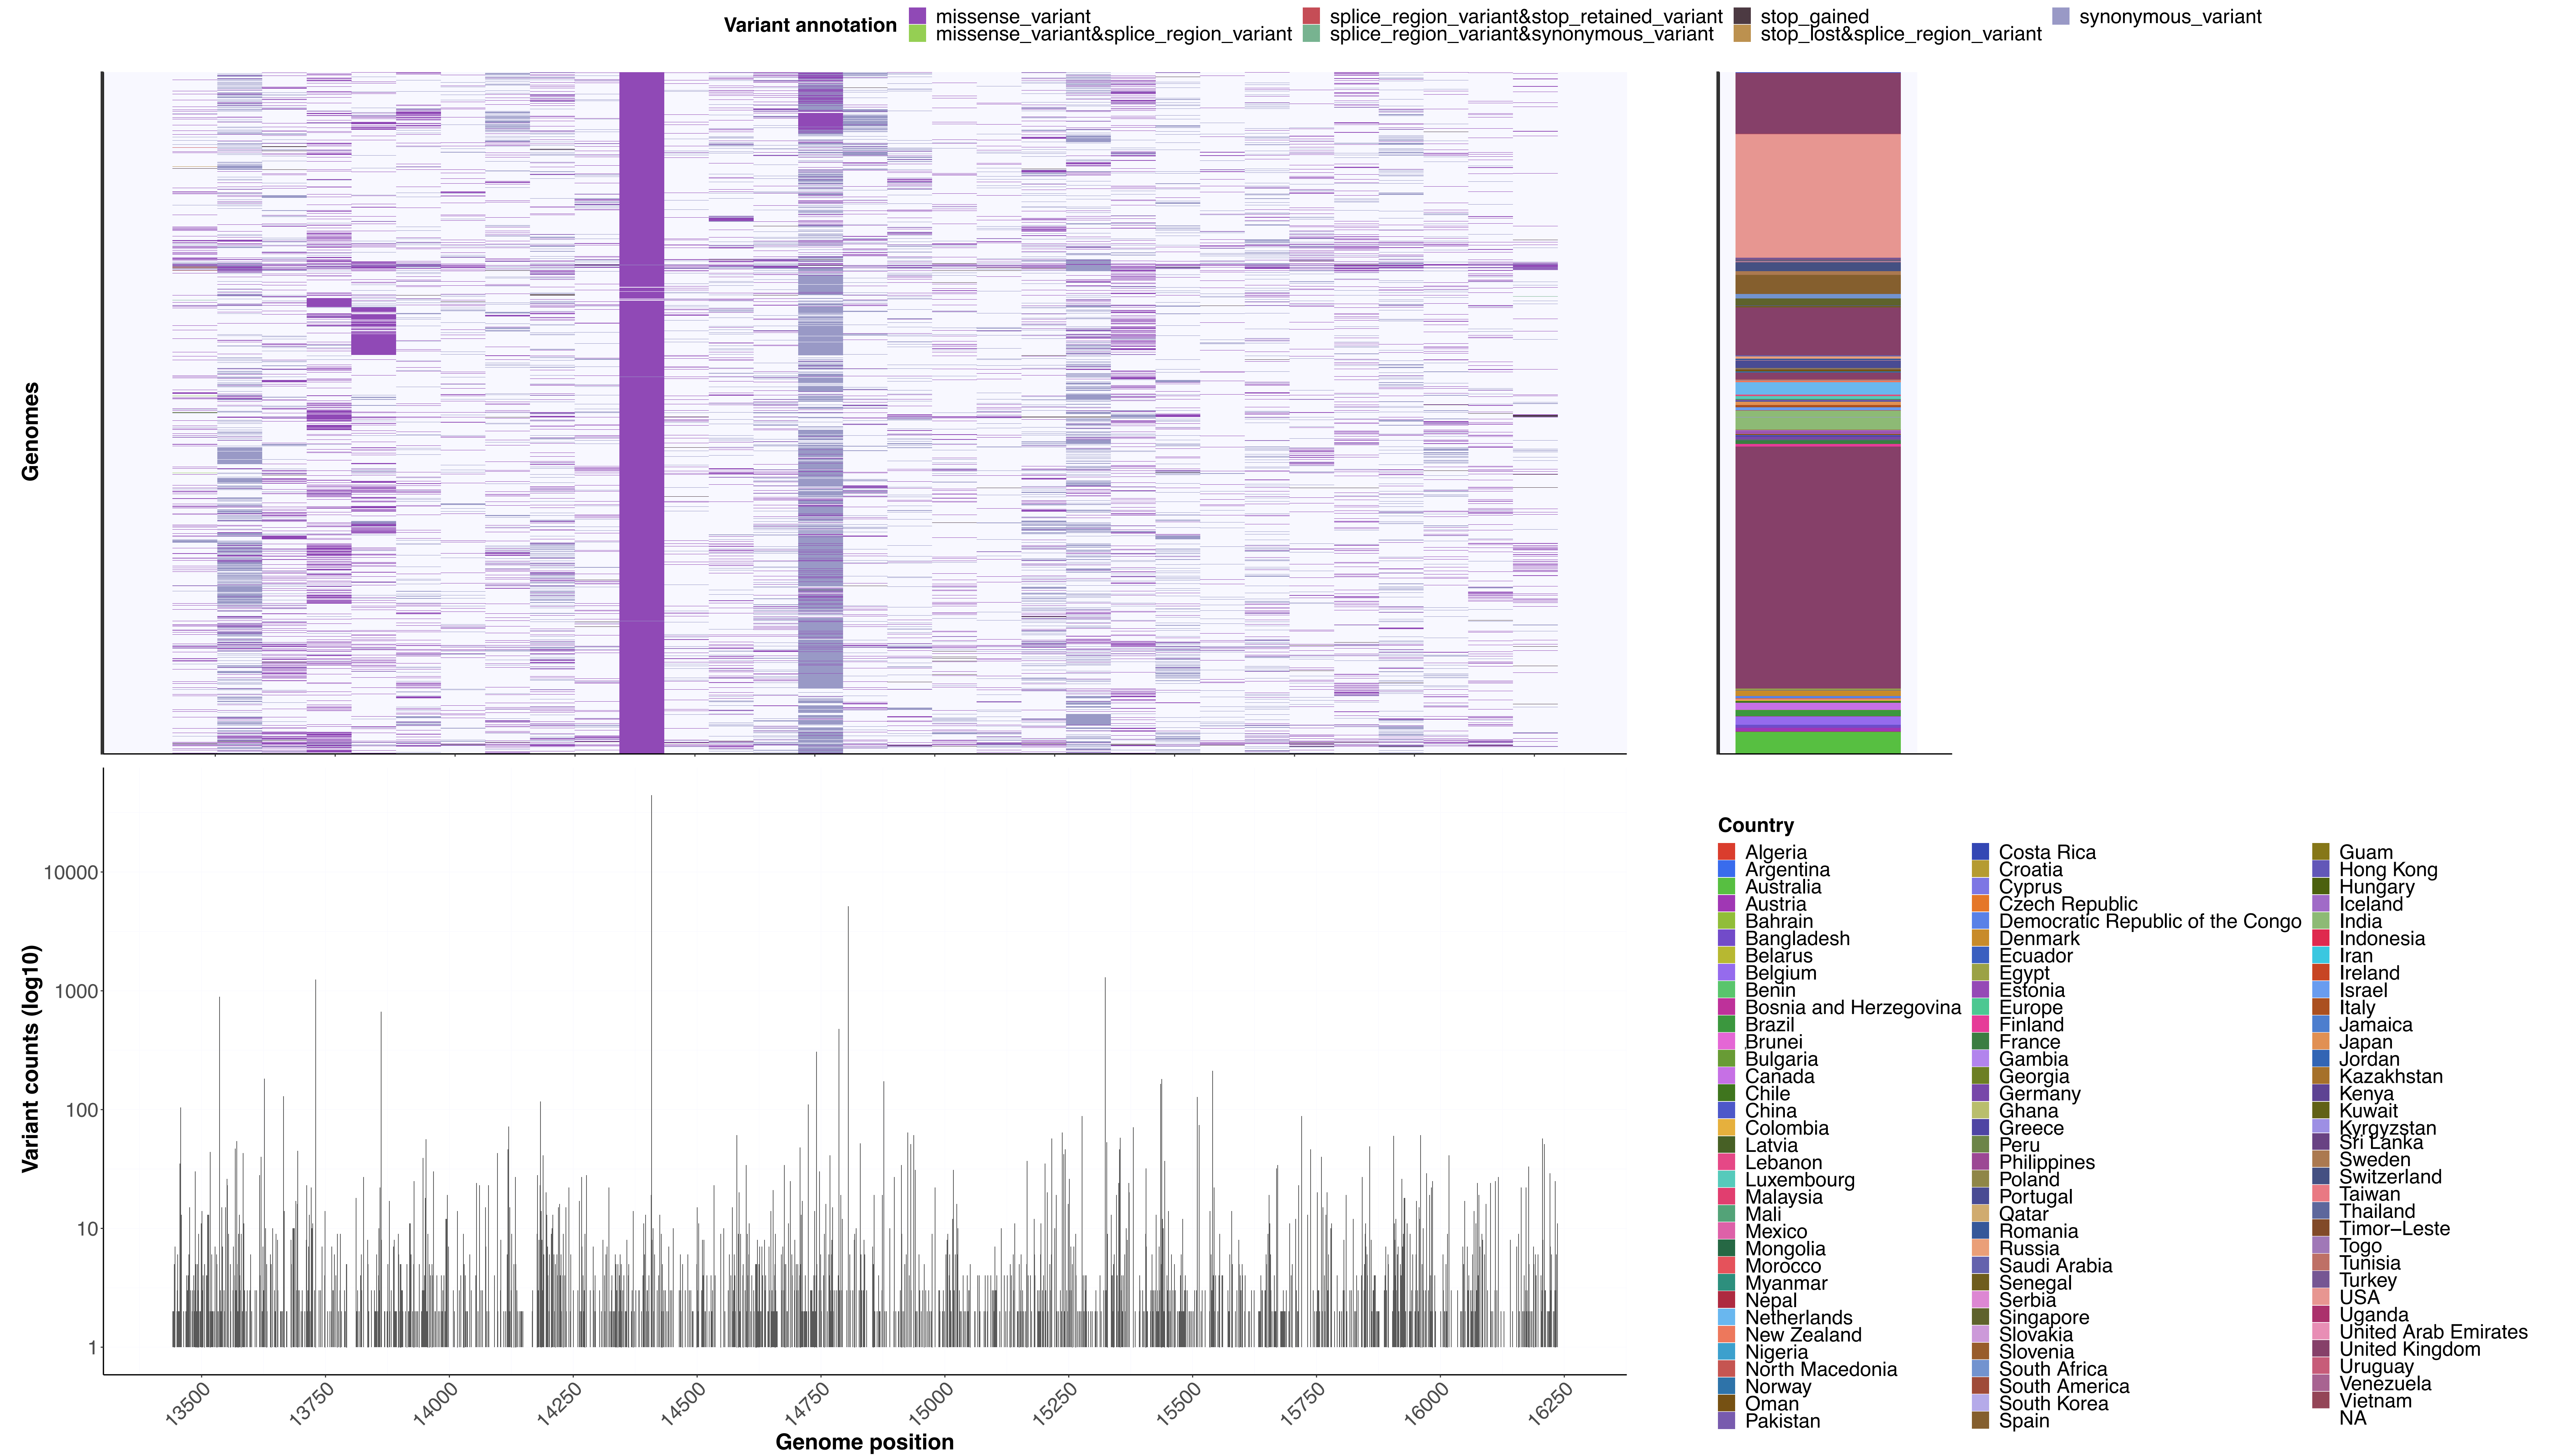

Supplement: s1 [file s1]

A

Remdesivir

Potential repurposed drug  
candidate for COVID-19

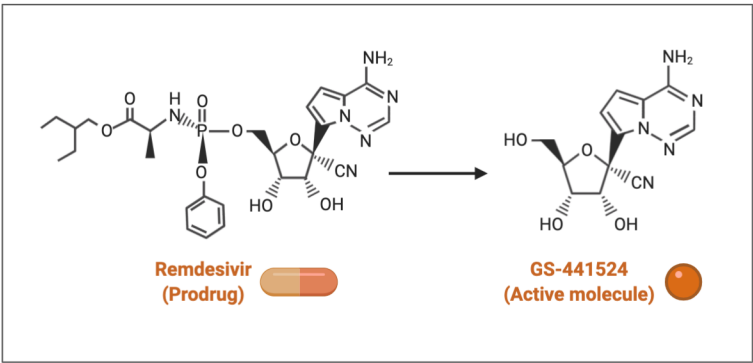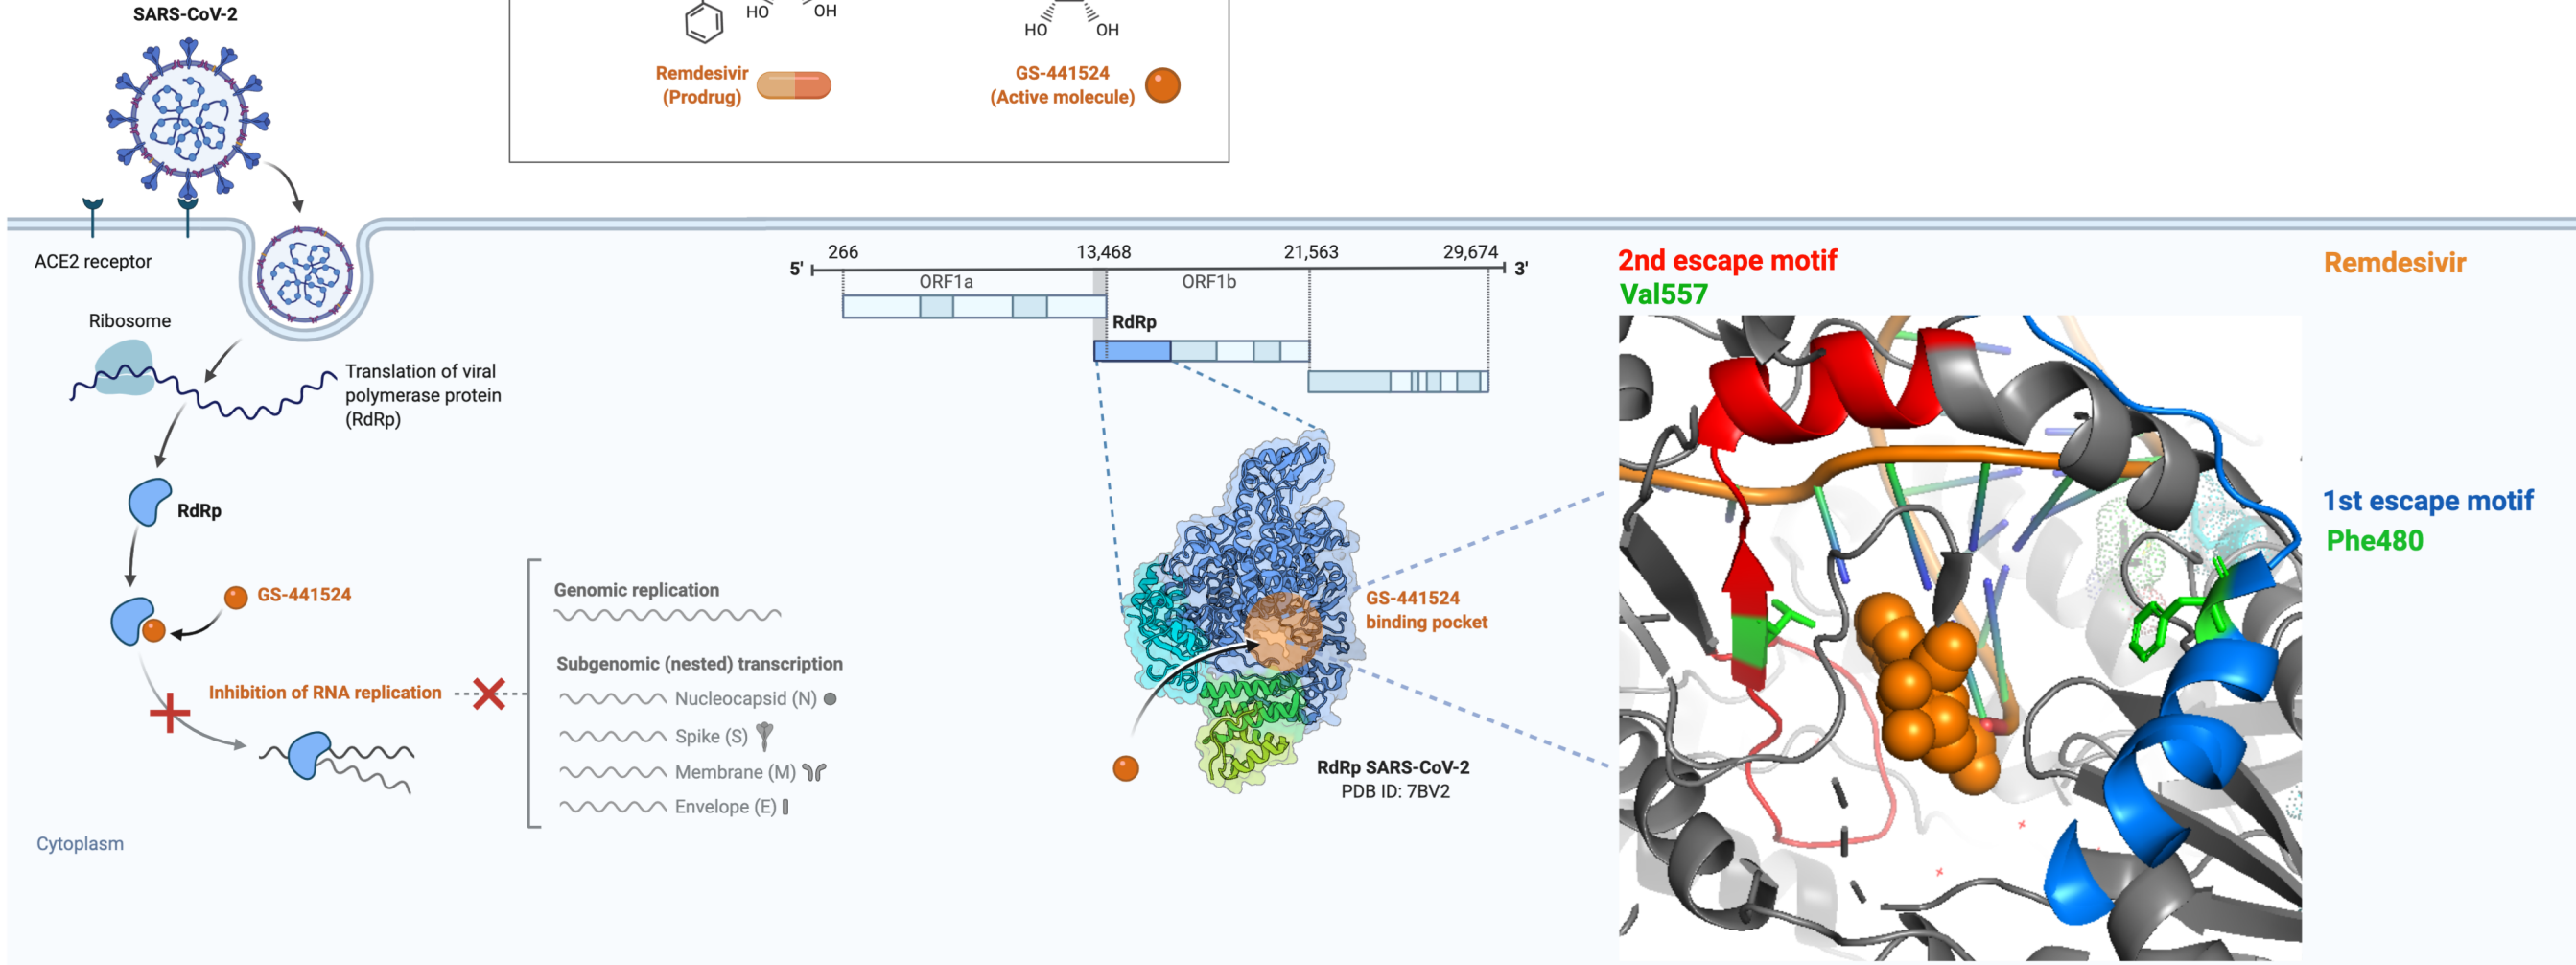

B

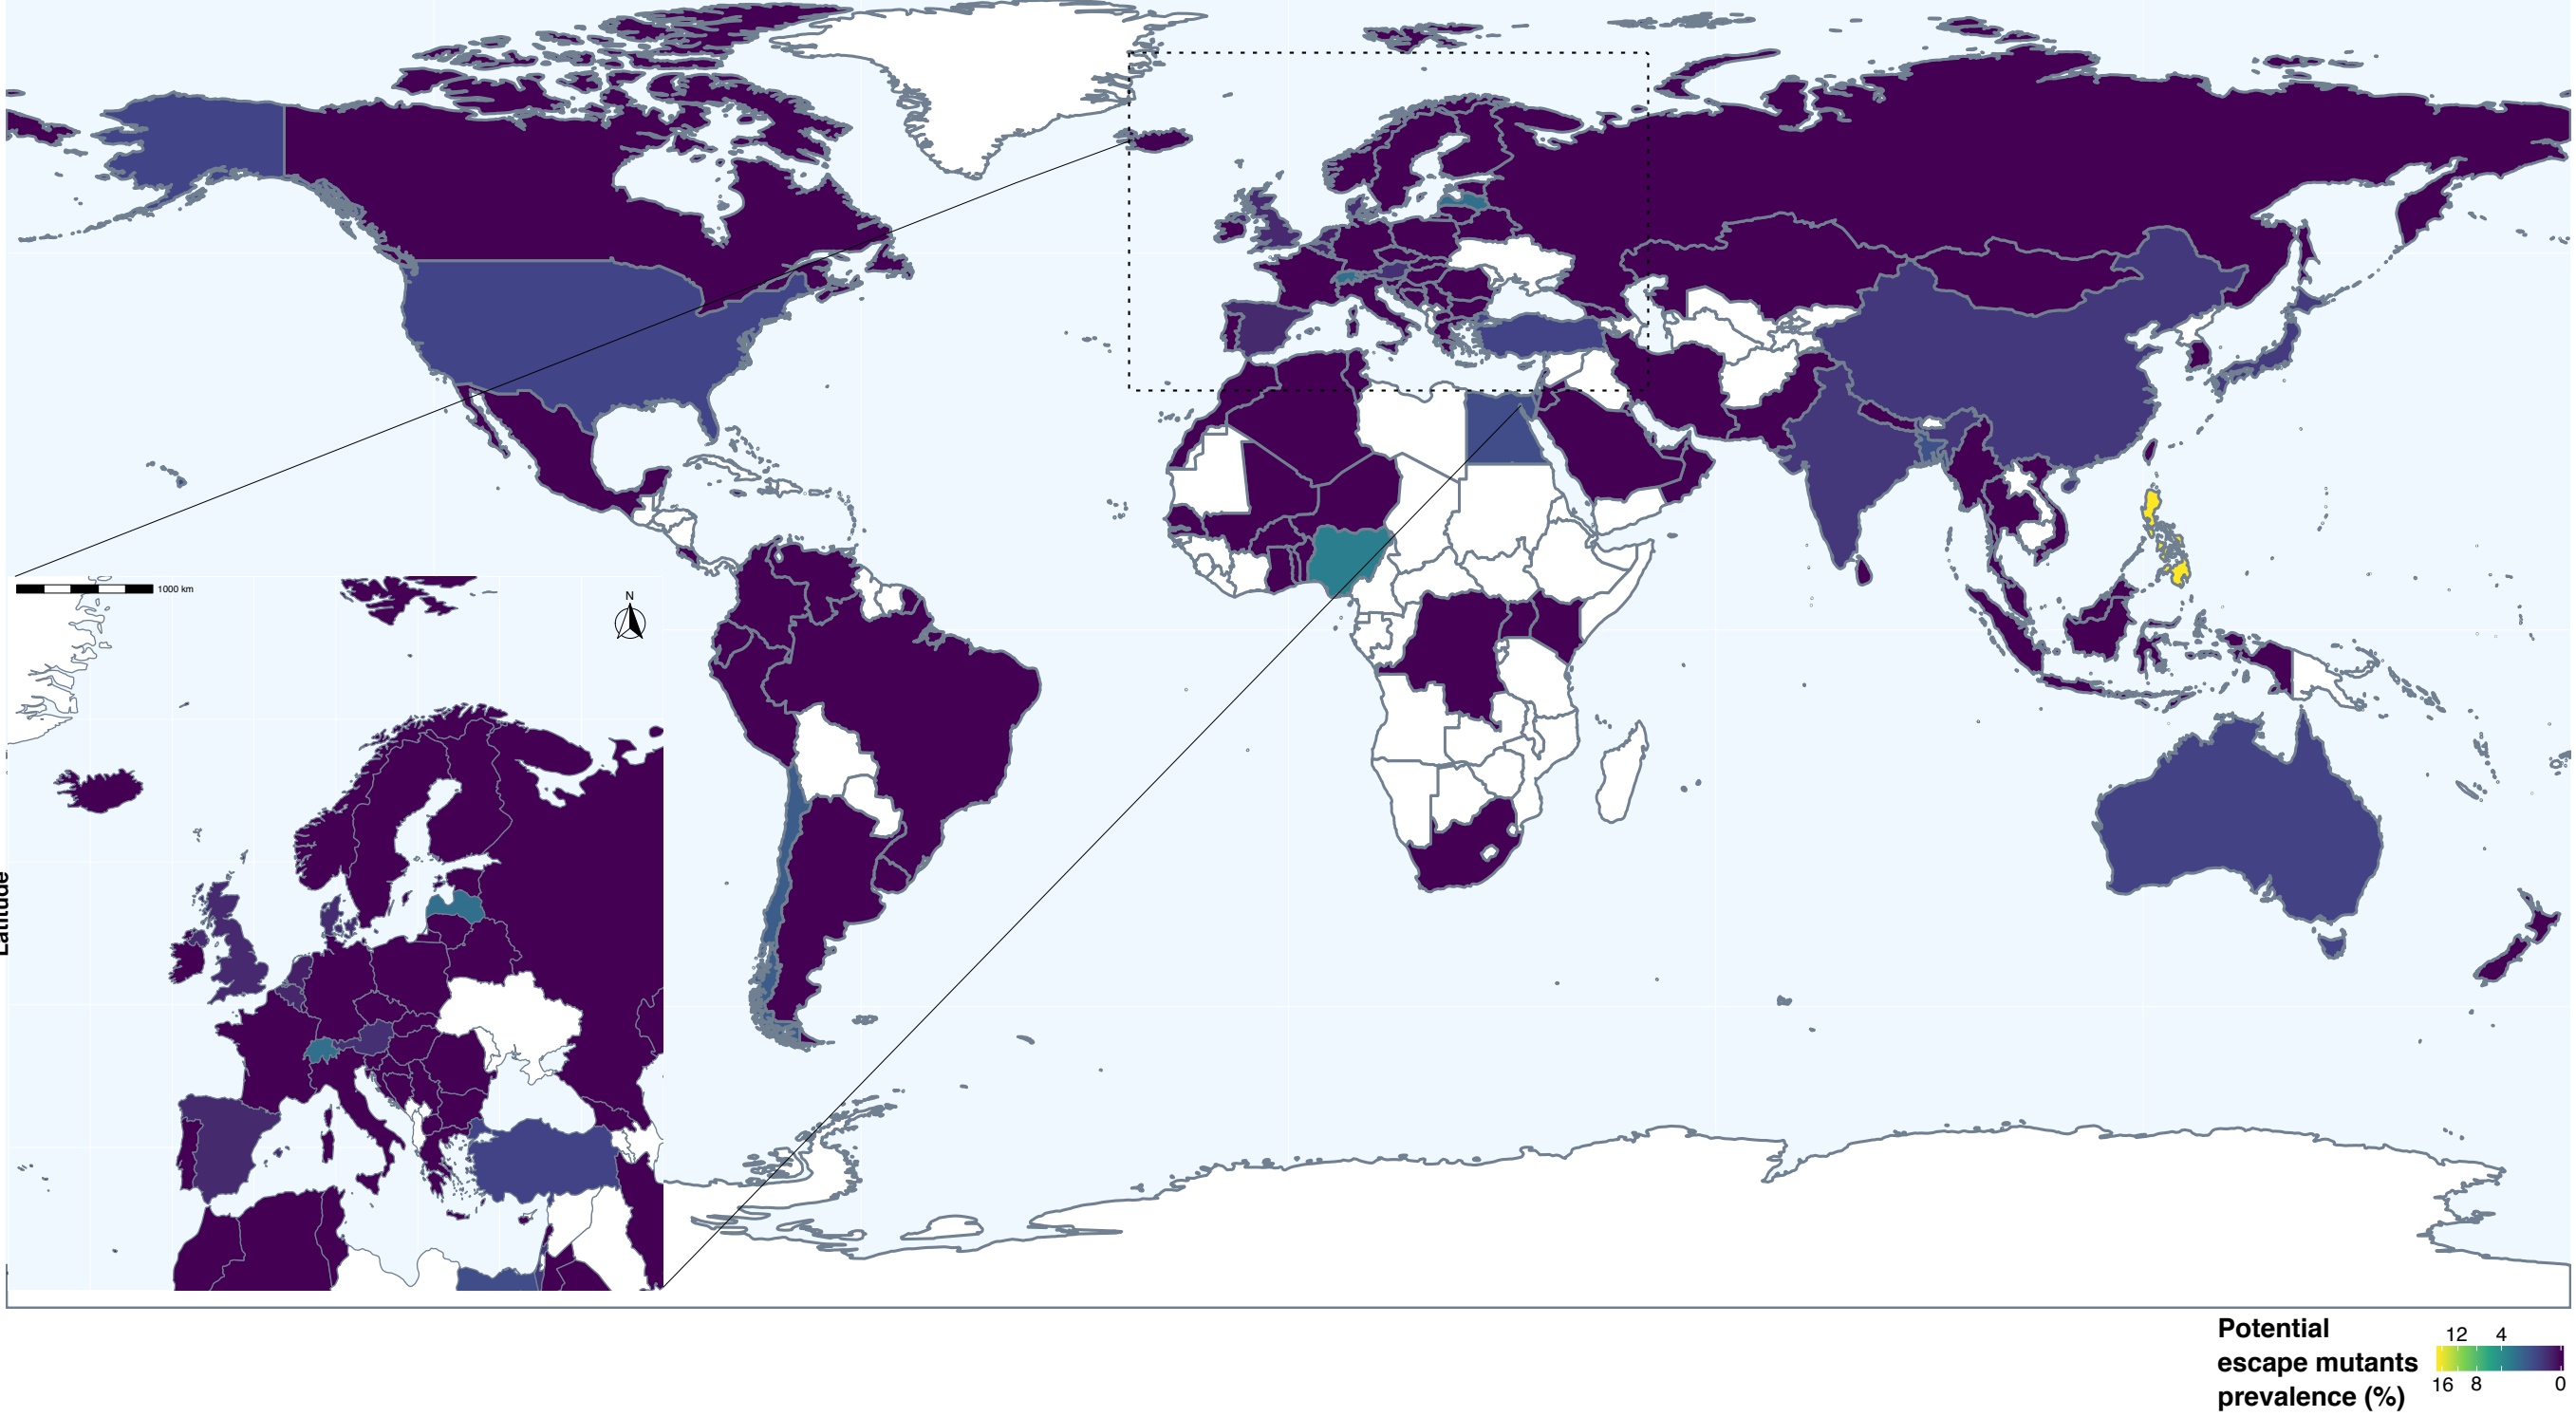

Supplement: s1 [file s1]

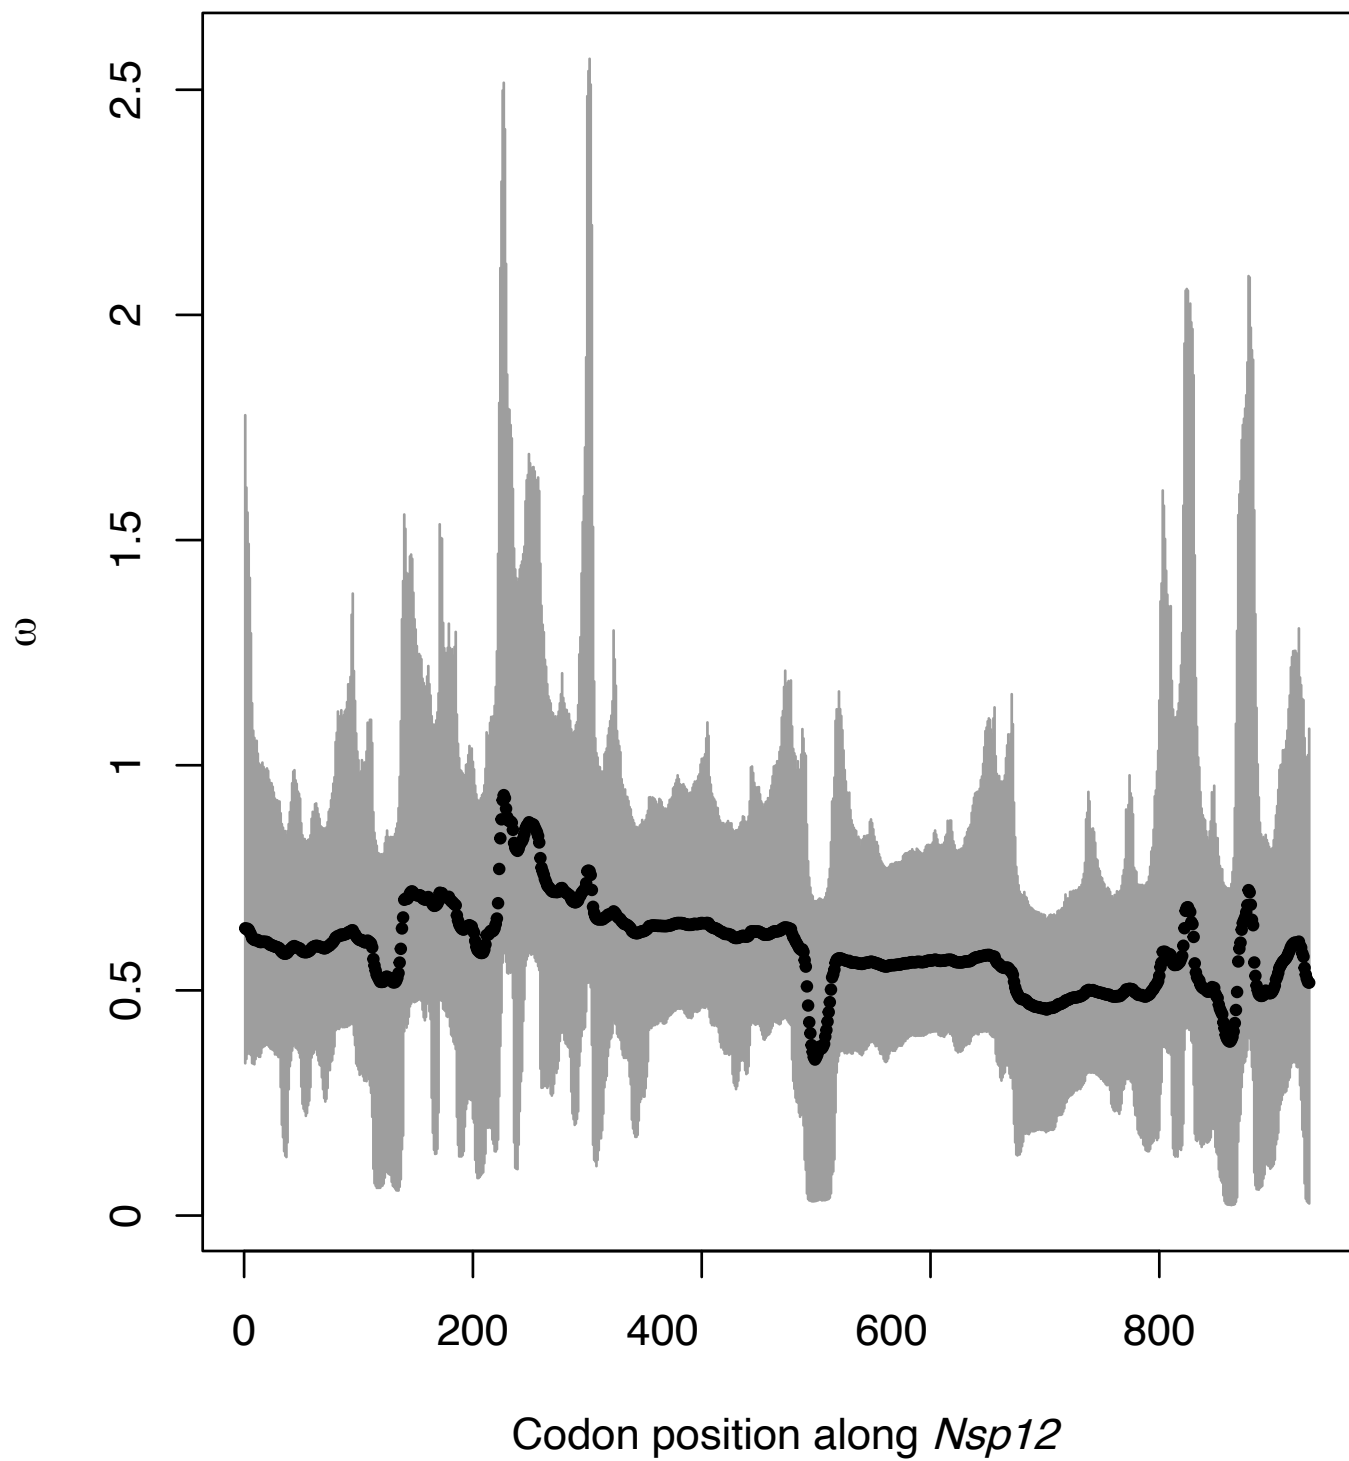

Supplement: s1 [file s1]

A

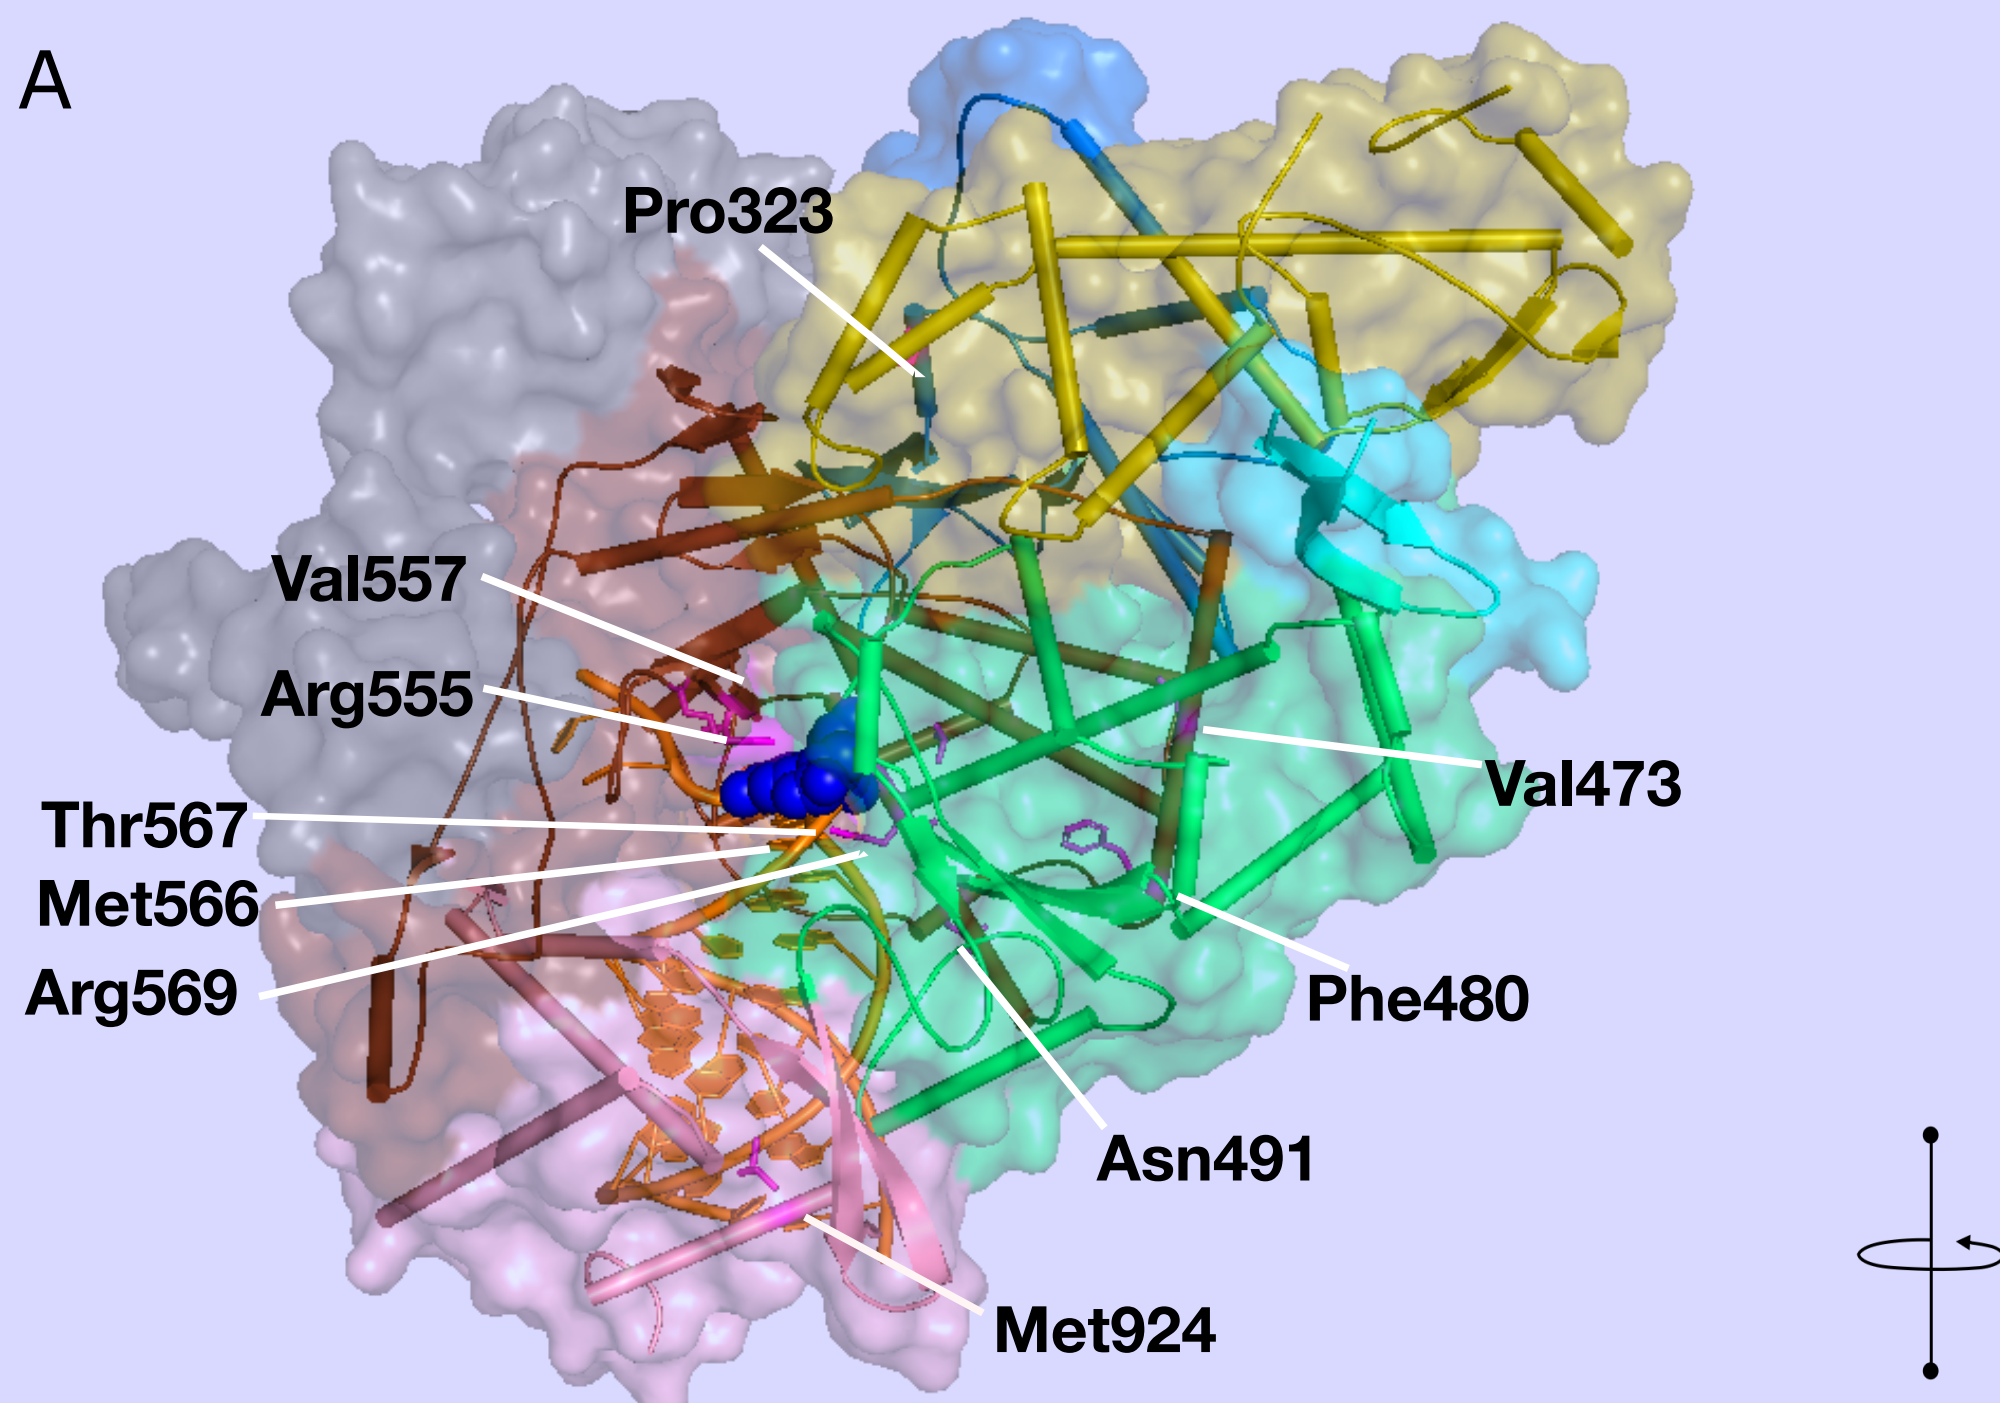

B

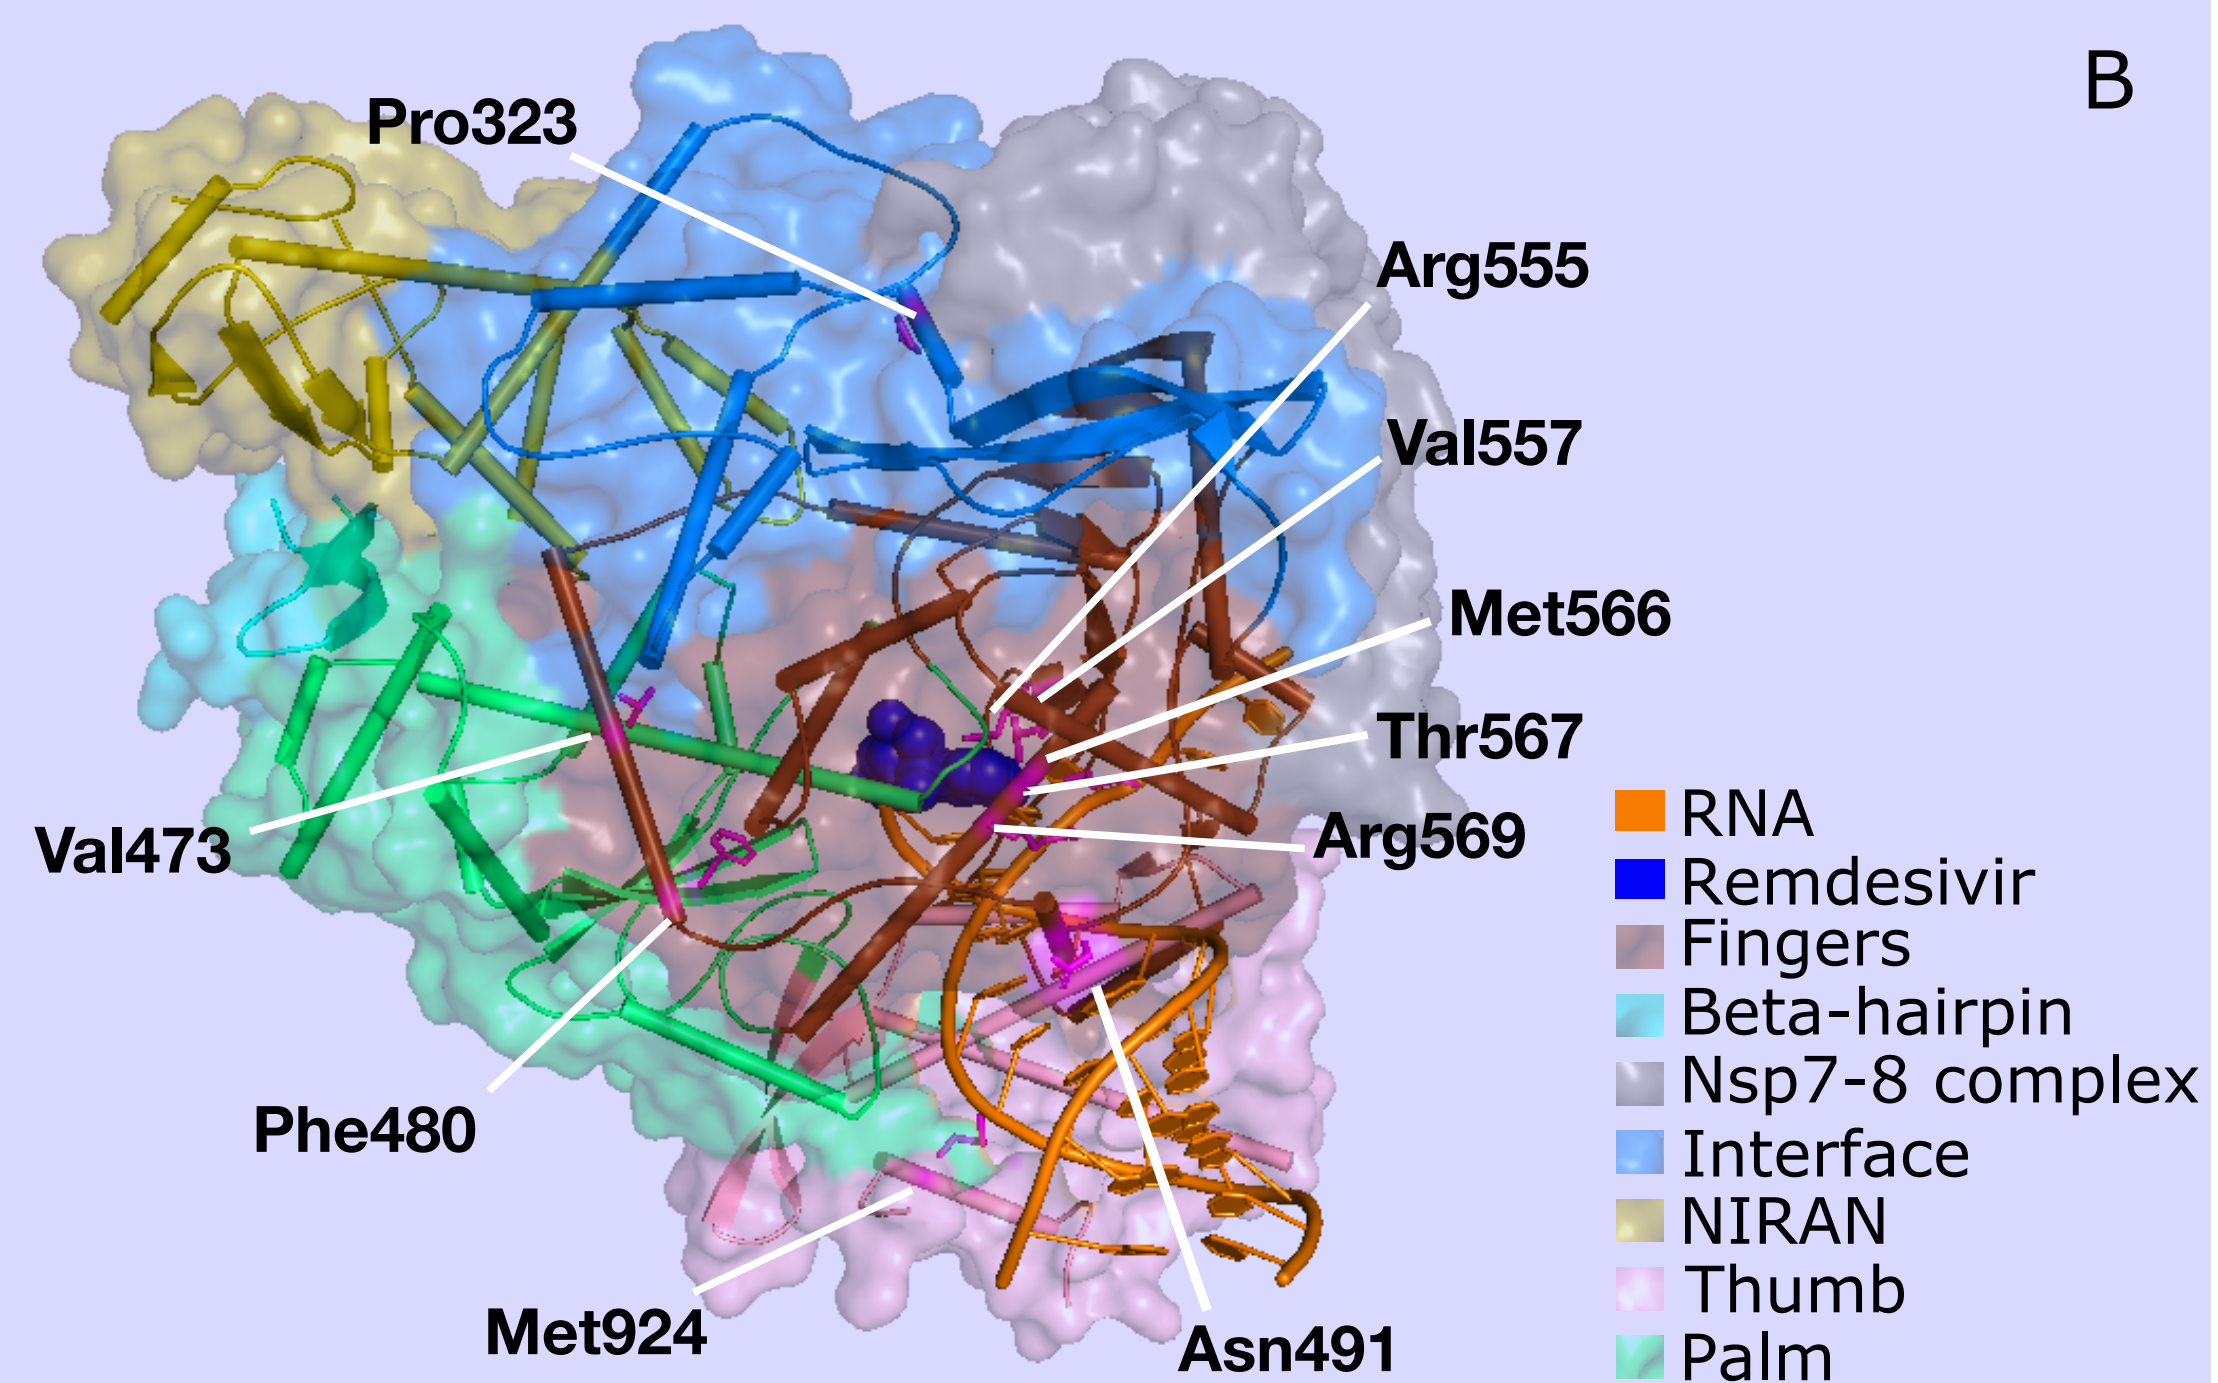

C

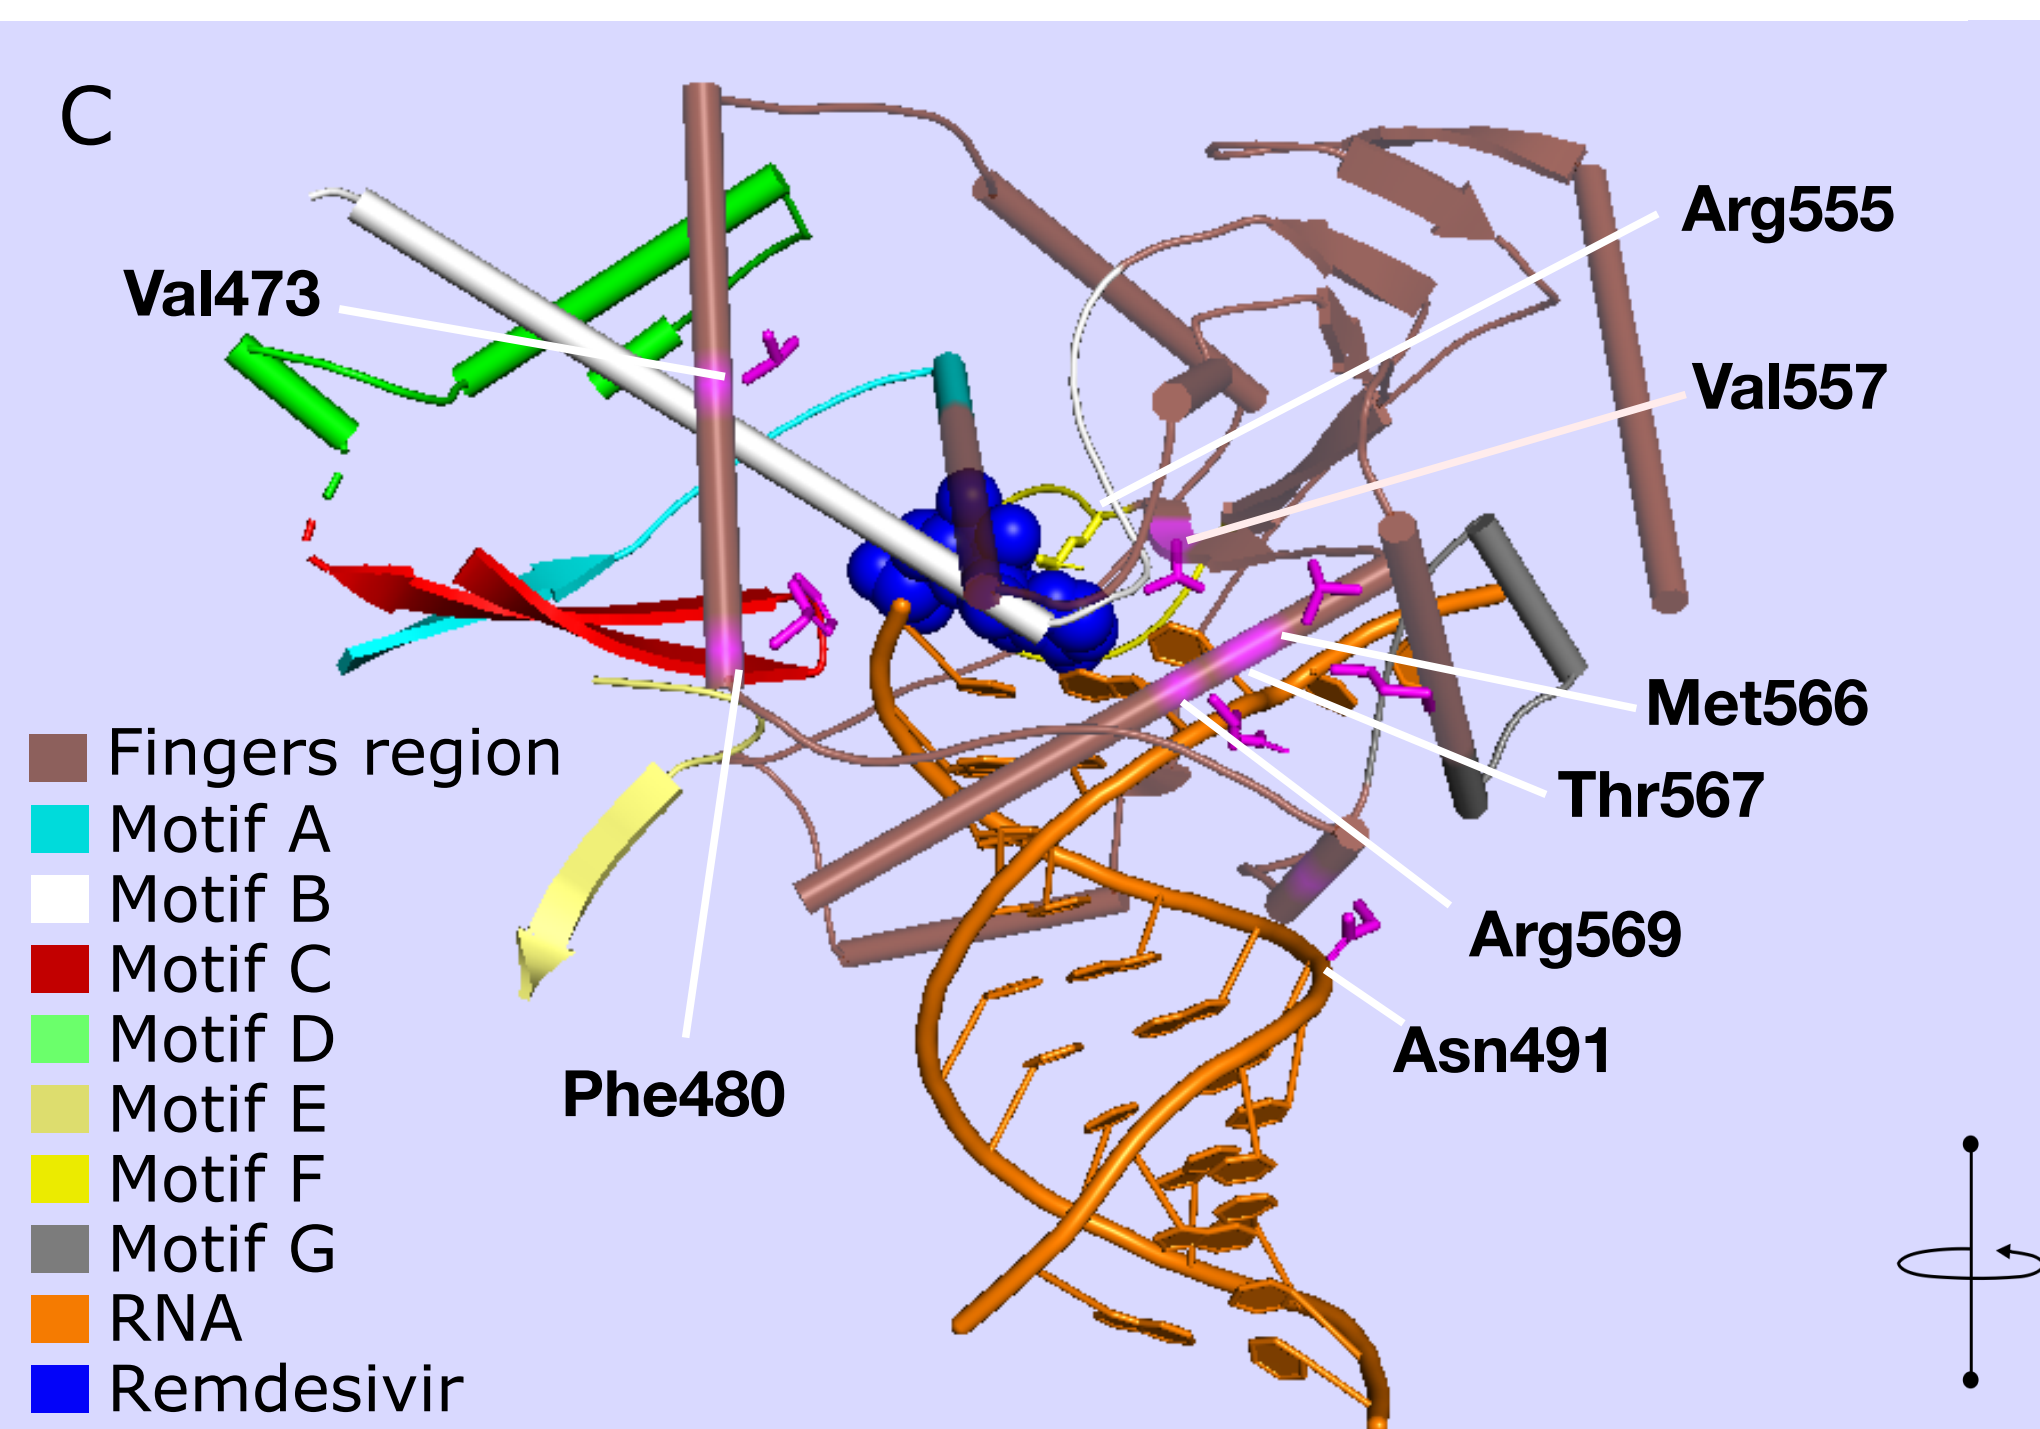

D

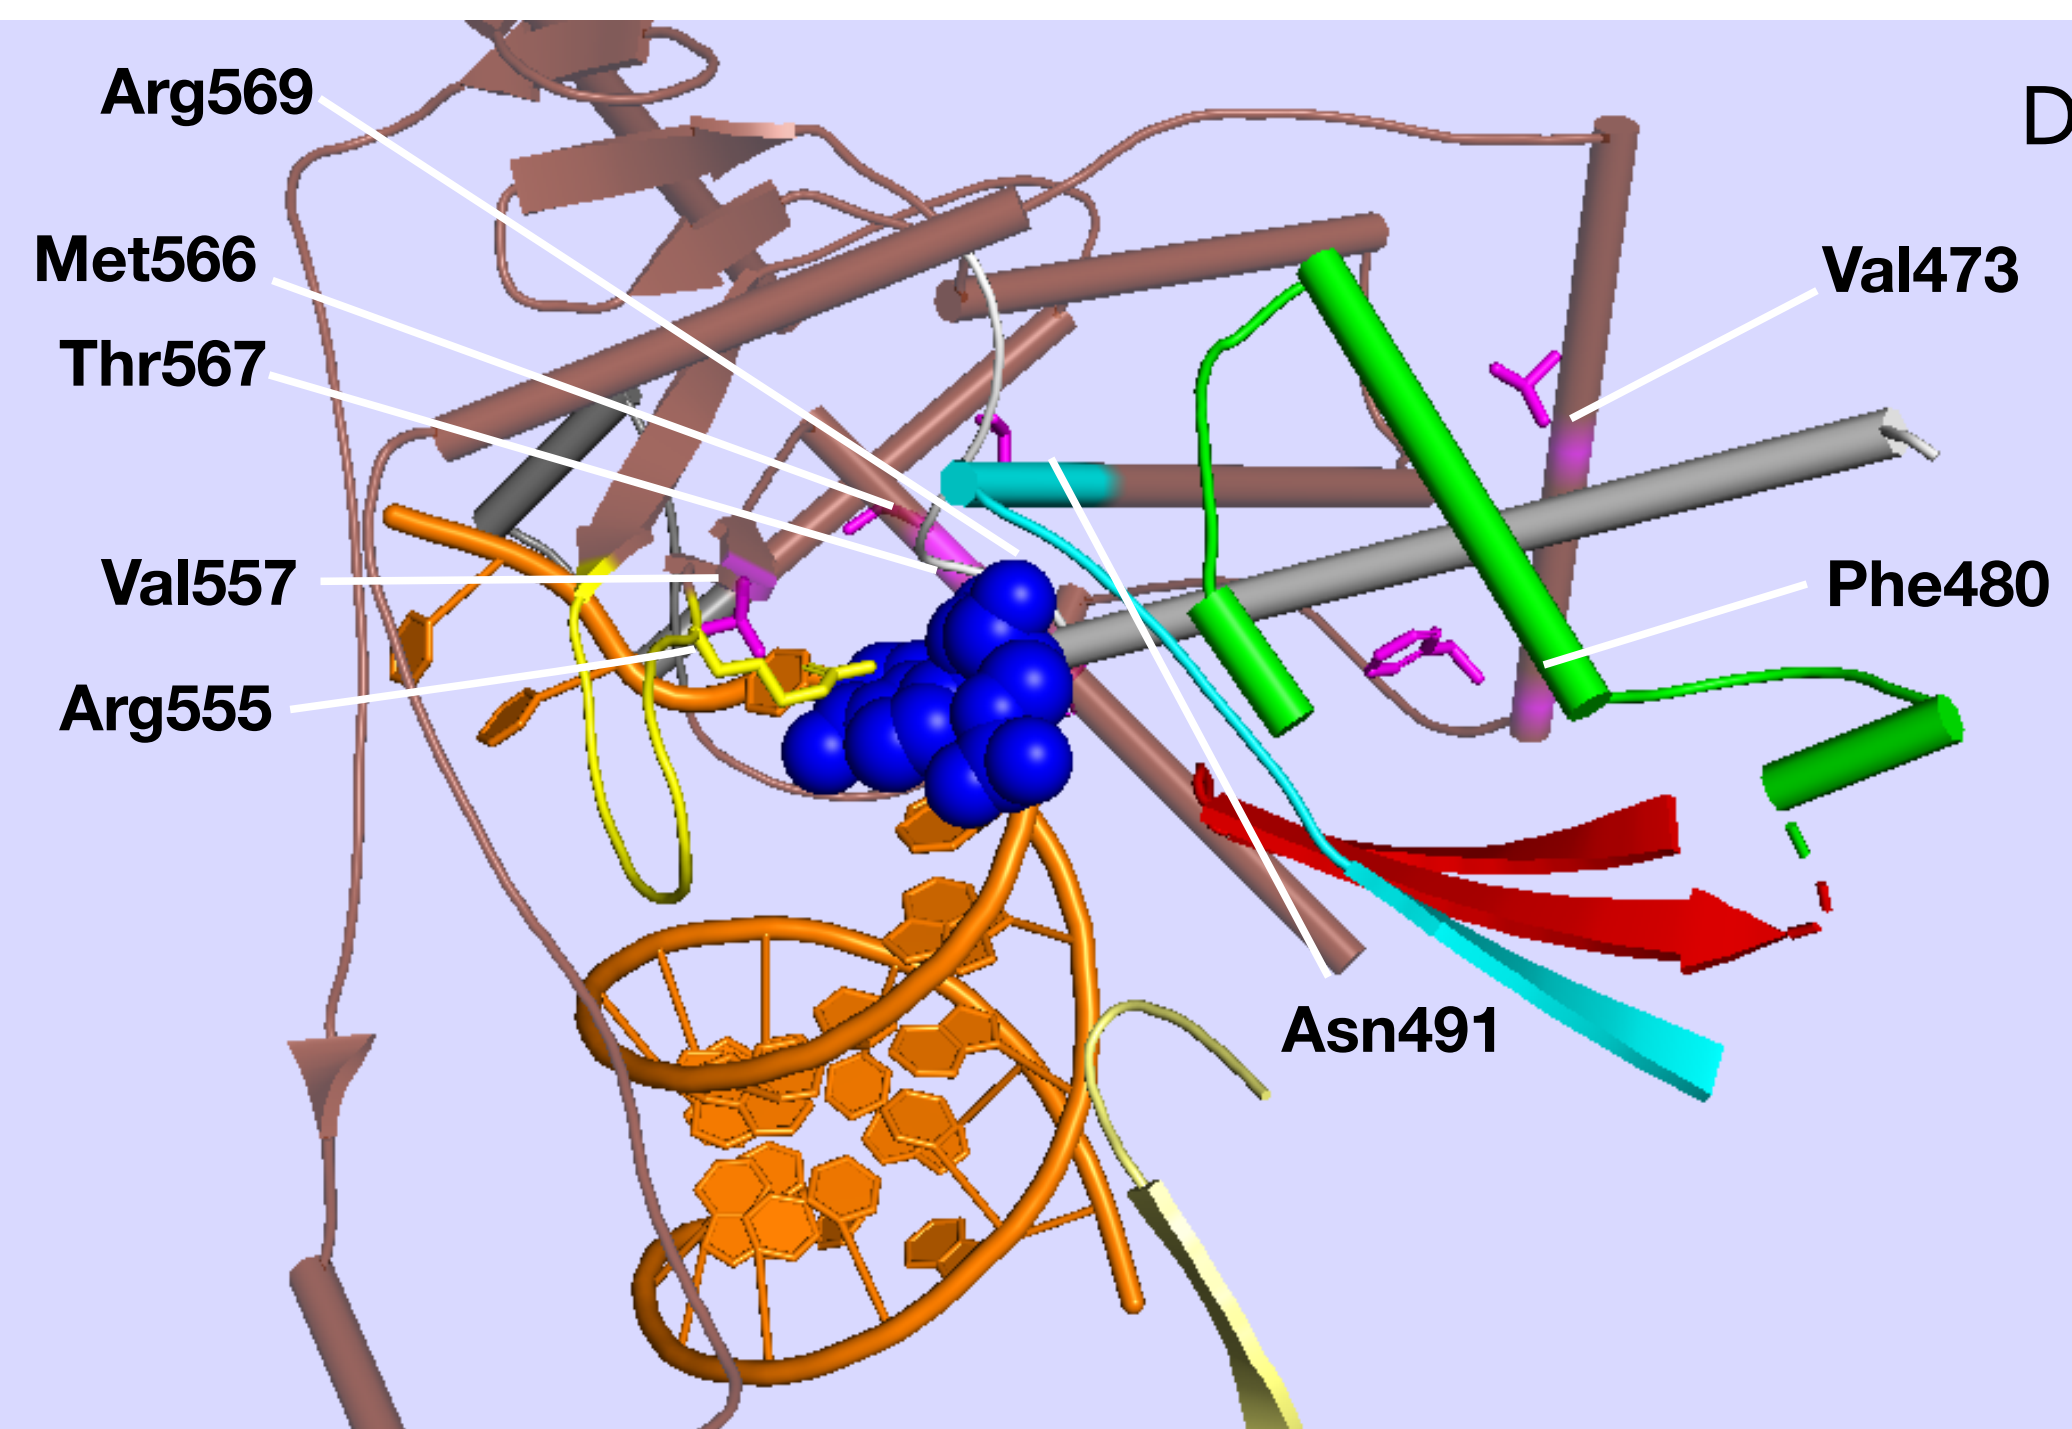

Supplement: s1 [file s1]
